# Supplementary material
Source: Springer Nature journal article supplement (https://www.springermedizin.de/resource/supplementary/12985_2009_576_MOESM3_ESM.pdf/9608488)

L M 1 3 5 7 9 11 13 15 17 19 21 23

Calnexin

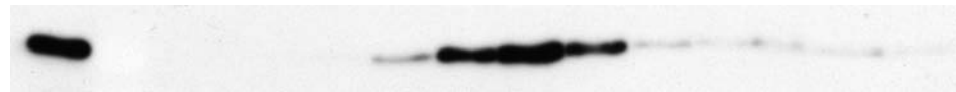

Transferrin receptor

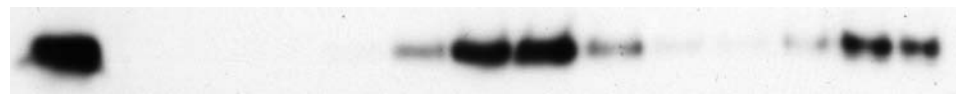

COX-IV

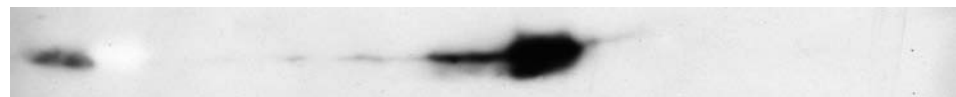

GAPDH

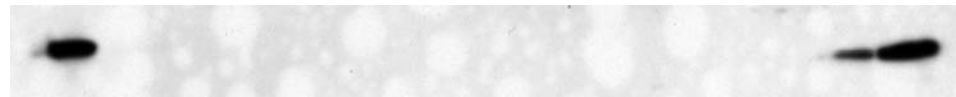

4B-CTD

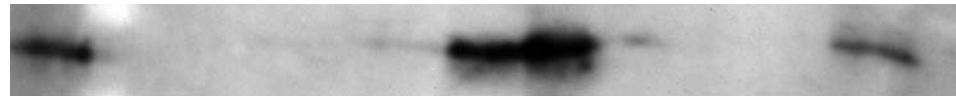

4B-CTD TripleE

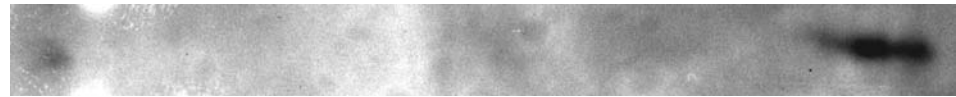

4B-CTD Helix swop

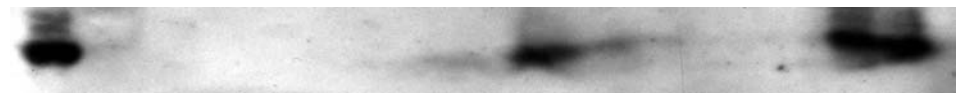

Supplement: MOESM3 [file 9608488]
